# Supplementary material for: Cost-Effectiveness of Chimeric Antigen Receptor T Cell Therapy in Patients with Relapsed or Refractory Large B Cell Lymphoma: No Impact of Site of Care
Source: Springer Nature journal article supplement (doi:10.1007/s12325-022-02188-0), 2022-06-11
Supplement: MOESM1 [file 23152212]

## Supplementary material

Cost-Effectiveness of Chimeric Antigen Receptor T-Cell Therapy in Patients with Relapsed or Refractory Large B-Cell Lymphoma - No Impact of Site of Care

AUTHORS: Cummings Joyner AK<sup>1</sup>, Snider JT<sup>2</sup>, Wade SW<sup>3</sup>, Wang ST<sup>1</sup>, Buessing MG<sup>1</sup>, Johnson S<sup>1</sup>, Gergis U<sup>4</sup>

<sup>1</sup>Medicus Economics, LLC, Milton, MA, USA,

<sup>2</sup>Kite, A Gilead Company, Santa Monica, CA, USA,

<sup>3</sup>Wade Outcomes Research and Consulting, Salt Lake City, UT, USA,

<sup>4</sup>Thomas Jefferson University Hospital, Philadelphia, PA, USA

Correspondence to:

Alice Kate Cummings Joyner

Medicus Economics, LLC

Email: [alicekate.cummings@medicuseconomics.com](mailto:alicekate.cummings@medicuseconomics.com)

**Figure S1 Costing types included in the model relative to date of CAR T-cell infusion**

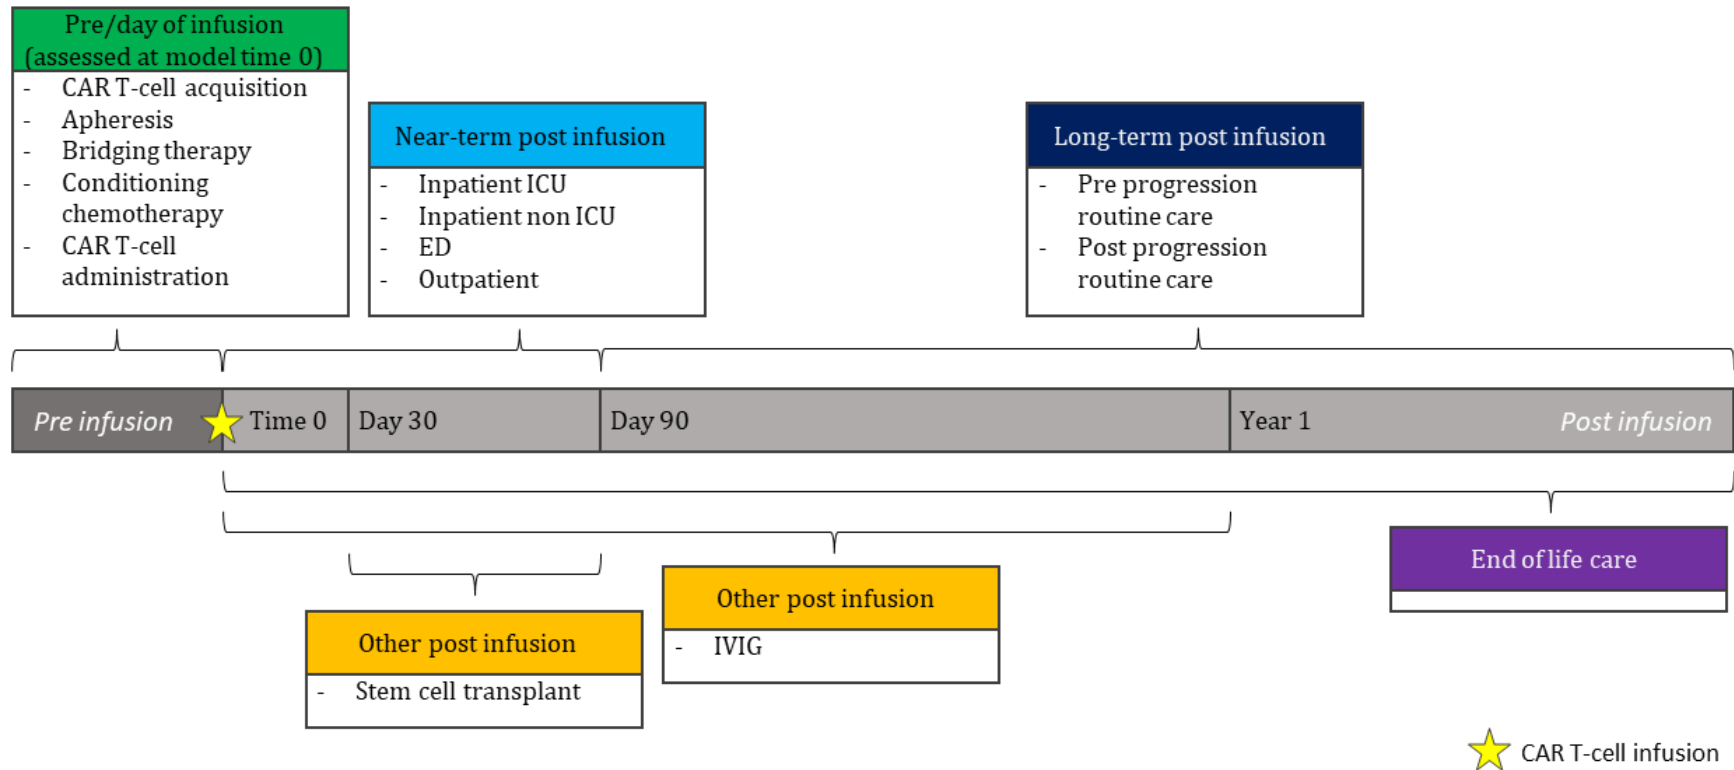

Abbreviations: CAR = chimeric antigen receptor; ED = Emergency Department; ICU = Intensive Care Unit; IVIG = intravenous immune globulin

**Figure S2a Overall and progression-free survival, axi-cel matched to liso-cel and liso-cel**

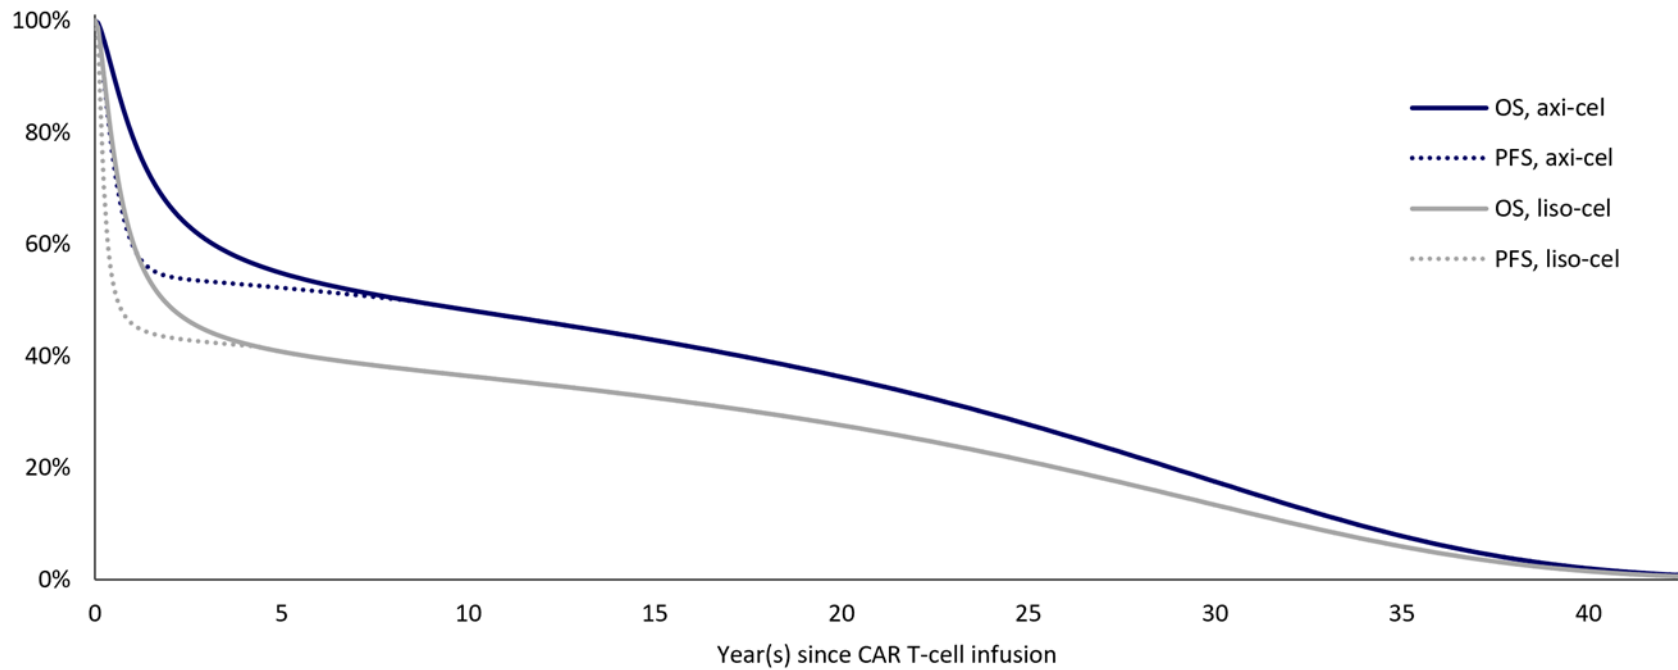

Abbreviations: CAR = chimeric antigen receptor; OS = overall survival; PFS = progression-free survival

These survival curves are derived from partitioned survival models of axi-cel versus liso-cel in third-line large B-cell lymphoma (LBCL).[1]

**Figure S2b Overall and progression-free survival, axi-cel matched to tisa-cel and tisa-cel**

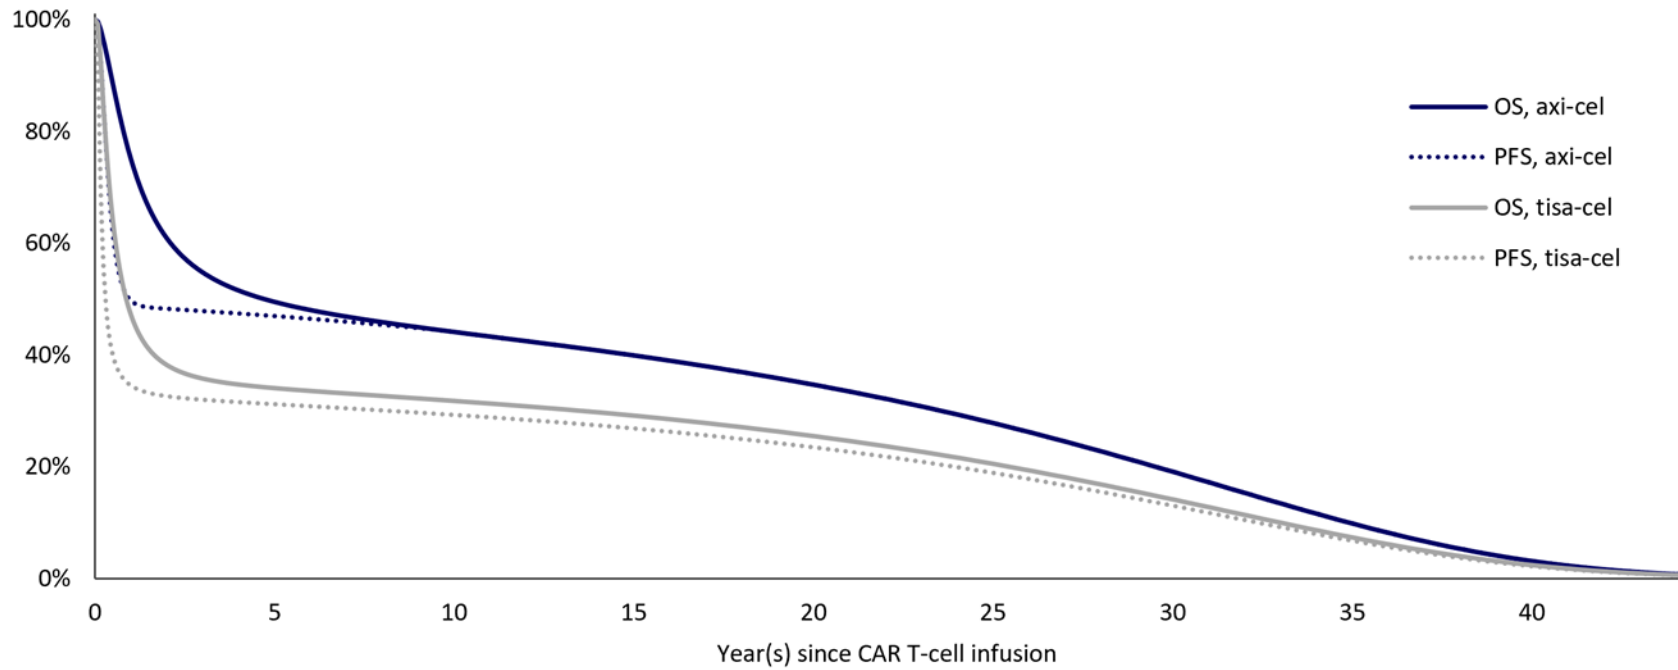

Abbreviations: CAR = chimeric antigen receptor; OS = overall survival; PFS = progression-free survival

These survival curves are derived from partitioned survival models of axi-cel versus tisa-cel in third-line LBCL.[2]

### **S3 Application of real-world data**

Among sample patients identified in the Anlitiks All-Payor Claims data, average per patient numbers of Intensive Care Unit (ICU) days, non-ICU inpatient days, outpatient visits and Emergency Department (ED) visits occurring during the 91-day period beginning on the day of chimeric antigen receptor (CAR) T-cell infusion (“follow-up period”) were evaluated separately for six mutually-exclusive patient groups defined by CAR T-cell site of care and adverse-event status:

- Inpatient site of care; evidence of cytokine release syndrome (CRS)
- Inpatient site of care; evidence of neurologic event (NE)
- Inpatient site of care; no evidence of CRS, NE, or infection
- Outpatient site of care; evidence of CRS
- Outpatient site of care; evidence of NE
- Outpatient site of care; no evidence of CRS, NE, or infection

In the model, resource use estimates for those with evidence of CRS were applied to patients with grade 3+ CRS without comorbid NE; estimates for those with evidence of NE were applied to patients with grade 3+ NE without comorbid CRS; and estimates for those without evidence of CRS, NE, or infection were applied to patients with neither grade 3+ CRS nor grade 3+ NE. For each category of resource use (i.e., ICU days, non-ICU inpatient days, outpatient visits and ED visits), the maximum of the average number of days/visits observed among patients with evidence of CRS and the average number of days/visits observed among patients with evidence of NE were applied to modeled patients with both grade 3+ CRS and grade 3+ NE.

**Table S4 Model inputs related to healthcare resource utilization**

|                                                               | <b>Base</b> | <b>Low</b> | <b>High</b> |
|---------------------------------------------------------------|-------------|------------|-------------|
| <b>Healthcare resource utilization, days 0-90<sup>a</sup></b> |             |            |             |
| <u>CAR T-cell site of care: inpatient</u>                     |             |            |             |
| <i>Patients with CRS but not NE</i>                           |             |            |             |
| ICU days / patient                                            | 2.08        | 1.66       | 2.49        |
| Non-ICU inpatient days / patient                              | 17.16       | 13.73      | 20.59       |
| ED visits / patient                                           | 0.06        | 0.05       | 0.07        |
| Outpatient visits / patient                                   | 5.04        | 4.03       | 6.04        |
| <i>Patients with NE but not CRS</i>                           |             |            |             |
| ICU days / patient                                            | 2.32        | 1.86       | 2.78        |
| Non-ICU inpatient days / patient                              | 16.83       | 13.47      | 20.20       |
| ED visits / patient                                           | 0.12        | 0.09       | 0.14        |
| Outpatient visits / patient                                   | 4.70        | 3.76       | 5.65        |
| <i>Patients with both CRS and NE</i>                          |             |            |             |
| ICU days / patient                                            | 2.32        | 1.86       | 2.78        |
| Non-ICU inpatient days / patient                              | 17.16       | 13.73      | 20.59       |
| ED visits / patient                                           | 0.12        | 0.09       | 0.14        |
| Outpatient visits / patient                                   | 5.04        | 4.03       | 6.04        |
| <u>CAR T-cell site of care: outpatient</u>                    |             |            |             |
| <i>Patients with CRS but not NE</i>                           |             |            |             |
| ICU days / patient                                            | 2.35        | 1.88       | 2.82        |
| Non-ICU inpatient days / patient                              | 7.81        | 6.24       | 9.37        |
| ED visits / patient                                           | 0.01        | 0.01       | 0.01        |
| Outpatient visits / patient                                   | 3.38        | 2.70       | 4.06        |
| <i>Patients with NE but not CRS</i>                           |             |            |             |
| ICU days / patient                                            | 2.01        | 1.61       | 2.41        |
| Non-ICU inpatient days / patient                              | 4.76        | 3.81       | 5.71        |
| ED visits / patient                                           | 0.02        | 0.02       | 0.03        |
| Outpatient visits / patient                                   | 2.16        | 1.73       | 2.59        |
| <i>Patients with both CRS and NE</i>                          |             |            |             |
| ICU days / patient                                            | 2.35        | 1.88       | 2.82        |
| Non-ICU inpatient days / patient                              | 7.81        | 6.24       | 9.37        |
| ED visits / patient                                           | 0.02        | 0.02       | 0.03        |
| Outpatient visits / patient                                   | 3.38        | 2.70       | 4.06        |

<sup>a</sup> Derived from Anlitiks All-Payor Claims data. Refer to S3 for more information.

Abbreviations: CAR = chimeric antigen receptor; CRS = cytokine release syndrome; ED = Emergency Department; ICU = Intensive Care Unit; NE = neurologic event

**Table S5 PSA inputs related to costs, CAR T-cell site of care, healthcare resource utilization, and health utilities**

|                                                                                      | <b>Mean</b> | <b>Standard error</b> | <b>Distribution</b> |
|--------------------------------------------------------------------------------------|-------------|-----------------------|---------------------|
| <b>Unit costs (\$)</b>                                                               |             |                       |                     |
| CAR T-cell administration cost                                                       | \$148       | \$15                  | GAMMA               |
| Apheresis cost / patient                                                             | \$112       | \$11                  | GAMMA               |
| <i>Cost / package</i>                                                                |             |                       |                     |
| Bendamustine                                                                         | \$2,474     | \$252                 | GAMMA               |
| Cyclophosphamide                                                                     | \$280       | \$29                  | GAMMA               |
| Fludarabine                                                                          | \$95        | \$10                  | GAMMA               |
| IVIG                                                                                 | \$999       | \$102                 | GAMMA               |
| Bridging therapy cost / patient                                                      | \$3,426     | \$350                 | GAMMA               |
| Lymphodepleting chemotherapy administration cost                                     | \$148       | \$15                  | GAMMA               |
| SCT cost / episode                                                                   | \$309,356   | \$31,567              | GAMMA               |
| IVIG administration cost                                                             | \$148       | \$15                  | GAMMA               |
| <i>Inpatient hospitalization cost / day</i>                                          |             |                       |                     |
| ICU day                                                                              | \$6,305     | \$643                 | GAMMA               |
| Non-ICU day                                                                          | \$2,875     | \$293                 | GAMMA               |
| ED visit cost                                                                        | \$124       | \$13                  | GAMMA               |
| Outpatient/other visit cost                                                          | \$183       | \$19                  | GAMMA               |
| <i>Routine care costs / patient / month, months 4+</i>                               |             |                       |                     |
| Pre progression, months 4-60                                                         | \$1,829     | \$187                 | GAMMA               |
| Pre progression, months 60+                                                          | \$365       | \$37                  | GAMMA               |
| Post progression                                                                     | \$1,829     | \$187                 | GAMMA               |
| End of life care cost / patient                                                      | \$19,529    | \$1,993               | GAMMA               |
| <b>CAR T-cell site of care<sup>a</sup></b>                                           |             |                       |                     |
| Inpatient %                                                                          | 82.9%       | 0.085                 | BETA                |
| Relative CRS and NE incidence between CAR T-cell sites of care, inpatient/outpatient | 1.38        | 0.14                  | GAMMA               |
| <b>Healthcare resource utilization, days 0-90</b>                                    |             |                       |                     |
| <u>CAR T-cell site of care: inpatient</u>                                            |             |                       |                     |
| <i>Patients with CRS but not NE</i>                                                  |             |                       |                     |
| ICU days / patient                                                                   | 2.08        | 0.21                  | GAMMA               |
| Non-ICU inpatient days / patient                                                     | 17.16       | 1.75                  | GAMMA               |
| ED visits / patient                                                                  | 0.06        | 0.01                  | GAMMA               |
| Outpatient visits / patient                                                          | 5.04        | 0.51                  | GAMMA               |
| <i>Patients with NE but not CRS</i>                                                  |             |                       |                     |
| ICU days / patient                                                                   | 2.32        | 0.24                  | GAMMA               |
| Non-ICU inpatient days / patient                                                     | 16.83       | 1.72                  | GAMMA               |
| ED visits / patient                                                                  | 0.12        | 0.01                  | GAMMA               |
| Outpatient visits / patient                                                          | 4.70        | 0.48                  | GAMMA               |

|                                            |       |       |       |
|--------------------------------------------|-------|-------|-------|
| <i>Patients with both CRS and NE</i>       |       |       |       |
| ICU days / patient                         | 2.32  | 0.24  | GAMMA |
| Non-ICU inpatient days / patient           | 17.16 | 1.75  | GAMMA |
| ED visits / patient                        | 0.12  | 0.01  | GAMMA |
| Outpatient visits / patient                | 5.04  | 0.51  | GAMMA |
| <u>CAR T-cell site of care: outpatient</u> |       |       |       |
| <i>Patients with CRS but not NE</i>        |       |       |       |
| ICU days / patient                         | 2.35  | 0.24  | GAMMA |
| Non-ICU inpatient days / patient           | 7.81  | 0.80  | GAMMA |
| ED visits / patient                        | 0.01  | 0.00  | GAMMA |
| Outpatient visits / patient                | 3.38  | 0.34  | GAMMA |
| <i>Patients with NE but not CRS</i>        |       |       |       |
| ICU days / patient                         | 2.01  | 0.21  | GAMMA |
| Non-ICU inpatient days / patient           | 4.76  | 0.49  | GAMMA |
| ED visits / patient                        | 0.02  | 0.00  | GAMMA |
| Outpatient visits / patient                | 2.16  | 0.22  | GAMMA |
| <i>Patients with both CRS and NE</i>       |       |       |       |
| ICU days / patient                         | 2.35  | 0.24  | GAMMA |
| Non-ICU inpatient days / patient           | 7.81  | 0.80  | GAMMA |
| ED visits / patient                        | 0.02  | 0.00  | GAMMA |
| Outpatient visits / patient                | 3.38  | 0.34  | GAMMA |
| <b>Health utilities</b>                    |       |       |       |
| On CAR T-cell therapy (month 1)            | 0.740 | 0.076 | BETA  |
| <i>Off therapy, months 2+</i>              |       |       |       |
| Pre progression, months 2-60               | 0.782 | 0.080 | BETA  |
| Pre progression, months 61+                | 0.820 | 0.084 | BETA  |
| Post progression                           | 0.390 | 0.040 | BETA  |

<sup>a</sup> Varied for each CAR T-cell therapy independently.

Abbreviations: CAR = chimeric antigen receptor; CRS = cytokine release syndrome; ED = Emergency Department; ICU = Intensive Care Unit; IVIG = intravenous immune globulin; NE = neurologic event; PSA = probabilistic sensitivity analysis; SCT = stem-cell transplant



**Table S6 Treatment-related PSA inputs**

|                                                 | Mean      | SE or ESS <sup>a</sup> | Distribution |
|-------------------------------------------------|-----------|------------------------|--------------|
| <u>Axi-cel</u>                                  |           |                        |              |
| CAR T-cell acquisition cost / patient (\$)      | \$399,000 | \$20,358               | GAMMA        |
| % receiving bridging therapy                    | 1.0%      | 0.051                  | BETA         |
| <i>% receiving lymphodepleting chemotherapy</i> |           |                        |              |
| Bendamustine                                    | 1.0%      | 101                    | DIRICHLET    |
| Cyclophosphamide-fludarabine                    | 98.0%     | 101                    | DIRICHLET    |
| % receiving SCT post CAR T-cell infusion        | 7.9%      | 0.008                  | BETA         |
| <i>Grade ≥ 3 AE incidence (%)</i>               |           |                        |              |
| <i>MAIC-matched axi-cel versus liso-cel</i>     |           |                        |              |
| CRS but not NE                                  | 3.0%      | 44.80                  | DIRICHLET    |
| NE but not CRS                                  | 22.8%     | 44.80                  | DIRICHLET    |
| Both CRS and NE                                 | 6.0%      | 44.80                  | DIRICHLET    |
| <i>MAIC-matched axi-cel versus tisa-cel</i>     |           |                        |              |
| CRS but not NE                                  | 2.9%      | 47.65                  | DIRICHLET    |
| NE but not CRS                                  | 20.7%     | 47.65                  | DIRICHLET    |
| Both CRS and NE                                 | 6.4%      | 47.65                  | DIRICHLET    |
| % receiving IVIG                                | 30.6%     | 0.031                  | BETA         |
| <u>Tisa-cel</u>                                 |           |                        |              |
| CAR T-cell acquisition cost / patient (\$)      | \$373,000 | \$19,031               | GAMMA        |
| % receiving bridging therapy                    | 91.9%     | 0.068                  | BETA         |
| <i>% receiving lymphodepleting chemotherapy</i> |           |                        |              |
| Bendamustine                                    | 19.8%     | 111                    | DIRICHLET    |
| Cyclophosphamide-fludarabine                    | 73.0%     | 111                    | DIRICHLET    |
| % receiving SCT post CAR T-cell infusion        | 5.4%      | 0.006                  | BETA         |
| <i>Grade ≥ 3 AE incidence (%)</i>               |           |                        |              |
| CRS but not NE                                  | 7.2%      | 111                    | DIRICHLET    |
| NE but not CRS                                  | 4.5%      | 111                    | DIRICHLET    |
| Both CRS and NE                                 | 9.9%      | 111                    | DIRICHLET    |
| % receiving IVIG                                | 30.0%     | 0.031                  | BETA         |
| <u>Liso-cel</u>                                 |           |                        |              |
| CAR T-cell acquisition cost / patient (\$)      | \$410,300 | \$20,934               | GAMMA        |
| % receiving bridging therapy                    | 59.1%     | 0.060                  | BETA         |
| <i>% receiving lymphodepleting chemotherapy</i> |           |                        |              |
| Bendamustine                                    | 1.0%      | 269                    | DIRICHLET    |
| Cyclophosphamide-fludarabine                    | 99.0%     | 269                    | DIRICHLET    |
| % receiving SCT post CAR T-cell infusion        | 7.6%      | 0.008                  | BETA         |
| <i>Grade ≥ 3 AE incidence (%)</i>               |           |                        |              |
| CRS but not NE                                  | 0.9%      | 228                    | DIRICHLET    |
| NE but not CRS                                  | 8.8%      | 228                    | DIRICHLET    |

|                  |       |       |           |
|------------------|-------|-------|-----------|
| Both CRS and NE  | 1.8%  | 228   | DIRICHLET |
| % receiving IVIG | 21.0% | 0.021 | BETA      |

<sup>a</sup> Reflects ESS when distribution is Dirichlet and SE otherwise.

Abbreviations: AE = adverse event; CAR = chimeric antigen receptor; CRS = cytokine release syndrome; ESS = effective sample size; IVIG = intravenous immune globulin; MAIC = matching-adjusted indirect comparison; NE = neurologic event; SCT = stem-cell transplant; SE = standard error

**Table S7 Axi-cel-related inputs for scenario analyses<sup>a</sup>**

|                                                               | <b>ZUMA-1 cohorts 1 &amp; 2 with unadjusted AE incidence rates<sup>b</sup></b> | <b>ZUMA-1 cohort 4[3]</b> | <b>ZUMA-1 cohort 6[4]</b> |
|---------------------------------------------------------------|--------------------------------------------------------------------------------|---------------------------|---------------------------|
| % receiving bridging therapy                                  | -                                                                              | 68.3%                     | 52.5%                     |
| % receiving SCT post CAR T-cell infusion                      | -                                                                              | -                         | 2.5%                      |
| <i>Grade <math>\geq 3</math> AE incidence (%)<sup>c</sup></i> |                                                                                |                           |                           |
| CRS but not NE                                                | 3.4%                                                                           | 0.8%                      | 0.0%                      |
| NE but not CRS                                                | 23.2%                                                                          | 15.4%                     | 12.5%                     |
| Both CRS and NE                                               | 7.5%                                                                           | 1.7%                      | 0.0%                      |

<sup>a</sup> Only input values different from those used in the base case analysis are reported here. In general, inputs for which data specific to the cohort of interest were not available were instead informed by ZUMA-1 cohorts 1 and 2.

<sup>b</sup> Unadjusted AE incidence rates for ZUMA-1 cohorts 1 and 2 came from Kite data on file [manuscript under review]. These rates reflect AE incidence over 2 years (the period during which AE data were systematically collected) for the Phase 2 ZUMA-1 patients.

<sup>c</sup> Data on the share of patients experiencing both CRS and NE were not available for any ZUMA-1 cohort. For each scenario, shares of patients with CRS but not NE, NE but not CRS, and both CRS and NE were derived from available data on the share of patients with CRS with or without NE and the share of patients with NE with or without CRS, assuming that the ratio of the share of patients with both CRS and NE to the smaller of the former two shares equals that reported for tisa-cel in the JULIET trial.[5] Abbreviations: AE = adverse event; CAR = chimeric antigen receptor; CRS = cytokine release syndrome; NE = neurologic event; SCT = stem-cell transplant

**Table S8a Scenario analysis results: Axi-cel versus liso-cel**

|                                                                    | <b>NMB</b>     |                 | <b>INMB<br/>(Axi-cel – liso-cel)</b> | <b>ICER</b> |
|--------------------------------------------------------------------|----------------|-----------------|--------------------------------------|-------------|
|                                                                    | <b>Axi-cel</b> | <b>Liso-cel</b> |                                      |             |
| Base case                                                          | \$518,624      | \$263,711       | \$254,913                            | \$8,946     |
| ZUMA-1 cohorts 1 & 2 with unadjusted AE incidence rates (scenario) | \$518,617      | \$263,711       | \$254,906                            | \$8,950     |
| ZUMA-1 cohort 4 with unadjusted AE incidence rates (scenario)      | \$516,216      | \$263,711       | \$252,505                            | \$10,278    |
| ZUMA-1 cohort 6 with unadjusted AE incidence rates (scenario)      | \$533,047      | \$263,711       | \$269,336                            | \$965       |
| 0% outpatient CAR T-cell site of care (scenario)                   | \$514,983      | \$260,453       | \$254,530                            | \$9,158     |
| 34% outpatient CAR T-cell site of care (scenario)                  | \$522,335      | \$266,993       | \$255,342                            | \$8,708     |

Abbreviations: AE = adverse event; CAR = chimeric antigen receptor; ICER = incremental cost-effectiveness ratio; INMB = incremental net monetary benefit; NMB = net monetary benefit

**Table S8b Scenario analysis results: Axi-cel versus tisa-cel**

|                                                                    | <b>NMB</b>     |                 | <b>INMB<br/>(Axi-cel – tisa-cel)</b> | <b>ICER</b> |
|--------------------------------------------------------------------|----------------|-----------------|--------------------------------------|-------------|
|                                                                    | <b>Axi-cel</b> | <b>Tisa-cel</b> |                                      |             |
| Base case                                                          | \$454,719      | \$174,246       | \$280,472                            | \$24,506    |
| ZUMA-1 cohorts 1 & 2 with unadjusted AE incidence rates (scenario) | \$454,744      | \$174,246       | \$280,498                            | \$24,494    |
| ZUMA-1 cohort 4 with unadjusted AE incidence rates (scenario)      | \$452,344      | \$174,246       | \$278,097                            | \$25,568    |
| ZUMA-1 cohort 6 with unadjusted AE incidence rates (scenario)      | \$469,139      | \$174,246       | \$294,892                            | \$18,053    |
| 0% outpatient CAR T-cell site of care (scenario)                   | \$451,123      | \$170,863       | \$280,260                            | \$24,601    |
| 34% outpatient CAR T-cell site of care (scenario)                  | \$458,379      | \$177,656       | \$280,723                            | \$24,394    |

Abbreviations: AE = adverse event; CAR = chimeric antigen receptor; ICER = incremental cost-effectiveness ratio; INMB = incremental net monetary benefit; NMB = net monetary benefit

## References

1. Oluwole OO, Liu R, Diakite I, Feng C, Patel A, Nourhussein I, et al. Cost-effectiveness of axicabtagene ciloleucel versus lisocabtagene maraleucel for adult patients with relapsed or refractory large B-cell lymphoma after two or more lines of systemic therapy in the US. *J Med Econ.* 2022;25(1):541-51.
2. Liu R, Oluwole OO, Diakite I, Botteman MF, Snider JT, Locke FL. Cost effectiveness of axicabtagene ciloleucel versus tisagenlecleucel for adult patients with relapsed or refractory large B-cell lymphoma after 2 or more lines of systemic therapy in the United States. *J Med Econ.* 2021:1.
3. Topp MS, van Meerten T, Houot R, Minnema MC, Bouabdallah K, Lugtenburg PJ, et al. Earlier corticosteroid use for adverse event management in patients receiving axicabtagene ciloleucel for large B-cell lymphoma. *Br J Haematol.* 2021;195(3):388-98.
4. Oluwole OO, Bouabdallah K, Muñoz J, De Guibert S, Vose JM, Bartlett NL, et al. Prophylactic corticosteroid use in patients receiving axicabtagene ciloleucel for large B-cell lymphoma. *Br J Haematol.* 2021;194(4):690-700.
5. Maziarz RT, Schuster SJ, Romanov VV, Rusch ES, Signorovitch J, Ericson SG, et al. Grading of Neurotoxicity in Patients with Relapsed or Refractory Diffuse Large B-Cell Lymphoma (r/r DLBCL) Receiving Tisagenlecleucel Treatment in the JULIET Study. *Blood.* 2018;132(Supplement 1):4183.
